# Supplementary material for: Deconstruction of a spino-brain-spinal cord circuit drives chronic mechanical pain
Source: Research Square preprint supplement (doi:10.21203/rs.3.rs-5292927/v1), 2025-10-13
Supplement: Supplementary file 1 [file 2f75dc204846121b474f775d.docx]

**Supplemental note: Strategies for Genetic Targeting of Oprm1-Expressing Cells**

Several approaches have been developed to achieve precise genetic manipulation of μ-opioid receptor (MOR/Oprm1)-expressing cells.

1. The Chen lab’s Oprm1Cre knock-in/knock-out line (current manuscript).

The Cre recombinase cDNA, followed by the rabbit β-globin poly-A signal, was introduced via homologous recombination immediately after the start codon in exon 1 of the mouse Oprm1 gene. This line allows Cre expression under control of endogenous Oprm1 promotor. Heterozygous mice exhibit normal phenotype, whereas homozygotes lack functional μ-opioid receptor expression and do not respond to endogenous or exogenous μ-opioid receptor ligands.

1. The Palmiter lab’s Oprm1Cre knock-in/knock-out line (Liu et al., 2021)

The cDNA of Cre recombinase and GFP fusion protein, followed by the rabbit β-globin poly-A signal, was introduced via homologous recombination immediately after the start codon in exon 1 of the mouse Oprm1 gene. This line allows expression of Cre:GFP fusion protein under control of endogenous Oprm1 promotor. Heterozygous mice exhibit normal phenotype, whereas homozygotes lack functional μ-opioid receptor expression and do not respond to endogenous or exogenous μ-opioid receptor ligands.

1. The Meletis lab’s Oprm1-2A-Cre mice (Martin et al., 2019)

A T2A-Cre cassette was inserted into the fifth exon of the Oprm1 gene and replacing a TAA stop codon by homologous recombination. This line allows expression of Cre recombinase under control of endogenous Oprm1 promotor. The endogenous μ-opioid receptor expression has not been disrupted.

1. The Kieffer lab’s Oprm1-2A-Cre:eGFP mice (Bailly et al., 2020)

A T2A-Cre:eGFP fusion protein cassette was inserted into the fourth exon of the Oprm1 gene and replacing a TAA stop codon by homologous recombination. This line allows expression of Cre:eGFP fusion protein under control of endogenous Oprm1 promotor. The endogenous μ-opioid receptor expression has not been disrupted.

1. The Watanabe lab’s Oprm1-2A-CreER mice (Okunomiya et al., 2020)

A T2A-CreER cassette was inserted into the fourth exon of the Oprm1 gene and replacing a TAA stop codon by homologous recombination. This line allows expression of a tamoxifen-inducible Cre recombinase under control of endogenous Oprm1 promotor. The endogenous μ-opioid receptor expression has not been disrupted.

1. The Corder lab’s Oprm1 targeting virus (Salimando et al., 2023)

The researcher developed a new promotor system for viral-assisted, species-specific, selective targeting of OPRM1+ cells. They cloned genomic sequence spanning -1797 to -265bp upstream of the ATG site of the mouse *Oprm1* gene into plasmids encoding various reporter, then packaged these constructs into AAV1 vectors (AAV1-mMORp1-reporter). The resulting mMORp construct exhibit robust and specific expression in endogenous MOR+ neurons across the mouse central and peripheral nervous systems. This specificity was confirmed through co-localization with MOR protein, *Oprm1* mRNA, and Cre-recombinase in transgenic lines, with minimal off-target glial expression. Remarkably, the mMORp system also functioned effectively in rats, shrews, and human iPSC-derived nociceptors, but not in non-neuronal cells (like cardiomyocytes) with low receptor expression. Similarly, the human construct, hMORp1 (-1841 to -257bp upstream of the human *OPRM1*ATG site), enabled efficient and selective transduction of OPRM1+ neurons in rhesus macaques. This versatile toolkit facilitates precise targeting and manipulation of opioidergic cells across multiple species. It supports diverse transgenes (reporters, sensors, actuators) and is compatible with various AAV serotypes optimized for different delivery routes and tissues.
