# Supplementary material for: Deconstruction of a spino-brain-spinal cord circuit drives chronic mechanical pain
Source: Research Square preprint supplement (doi:10.21203/rs.3.rs-5292927/v1), 2025-10-13
Supplement: Supplementary file 2 [file 3884d5367a02174e2bea32ce.docx]

| **Figure** | **Groups** | **Statistical Analysis** |
| --- | --- | --- |
| Fig. 1f | Baseline vs. DAMGO (6 cells from 6 mice）  Baseline vs. DAMGO + CTAP (5 cells from 5 mice） | Wilcoxon matched-pairs signed-rank test  Baseline vs. DAMGO: P < 0.05  Baseline vs. DAMGO + CTAP: *P* = 0.4275 |
| Fig. 1i | Pre, day2, 7, 14, and 28 post SNI (n = 8, 5 males, 3 females) | Nonparametric ANOVA (Friedman test)  Two-stage linear step-up procedure of Benjamini, Krieger and Yekutieli  Pre vs. D2: *P* = 0.1004  Pre vs. D7: *P* < 0.001  Pre vs. D14: *P* < 0.001  Pre vs. 28: *P* < 0.01  D2 vs. D7: *P* < 0.05  D2 vs. D14: *P* = 0.0586  D2 vs. D28: *P* = 0.1625  D7 vs. D14: *P* = 0.6427  D7 vs. D28: *P* = 0.3943  D14 vs. D28: *P* = 0.4305 |
| Fig. 1i | Locomotion (SNI)  Escape (SNI) | Linear regression  Average Speed vs average %ΔF/F (SNI)  Locomotion: R2 = 0.08744  95% Confidence Intervals  Slope -0.01584 to -0.003388  Y-intercept-0.1342 to -0.01959  X-intercept -38.36 to -1.277  Escape: R2 = 0.8453  95% Confidence Intervals  Slope 0.1666 to 0.2133  Y-intercept -0.9792 to -0.4219  X-intercept 2.453 to 4.740 |
| Fig. 2b | hM4D Von Frey saline vs. CLZ (n = 8, 4 males, 4 females)  hM3D Von Frey saline vs. CLZ (n = 10, 5 males, 5 females)  hM4D Plantar Cold saline vs. CLZ (n = 9, 5 males, 4 females)  hM3D Plantar Cold saline vs. CLZ (n = 9, 5 males, 4 females) | Wilcoxon matched-pairs signed rank test  hM4D Von Frey saline vs. CLZ: *P* < 0.01  hM3D Von Frey saline vs. CLZ: *P* = 0.9004  hM4D Plantar Cold saline vs. CLZ: *P* < 0.01  hM3D Plantar Cold saline vs. CLZ: *P* = 0.4258 |
| Fig. 2d | Control (n = 7, 3 males + 4 females)  Caspase (n = 8, 4 males + 4 females) | Mann-Whitney test  Pre-ablation control vs. caspase: *P* = 0.2146  Post-ablation control vs. caspase: *P* = 0.5175  2d post SNI control vs. caspase: *P* < 0.001  7d post SNI control vs. caspase: *P* < 0.001  14d post SNI control vs. caspase: *P* < 0.001  28d post SNI control vs. caspase: *P* < 0.001 |
| Fig. 2e | Control (n = 7, 4 males + 3 females)  Caspase (n = 8, 4 males + 4 females) | Mann-Whitney test  Pre-ablation control vs. caspase: *P* < 0.05  Post-ablation control vs. caspase: *P* = 0.11  1d post CFA control vs. caspase: *P* < 0.001  2d post SNI control vs. caspase: *P* < 0.001  3d post SNI control vs. caspase: *P* < 0.001 |
| Fig. 2f | CLZ-mCherry (n = 8, 4 males + 4 females)  CLZ hM4D (n = 8, 4 males + 4 females) | Mann-Whitney test  Pre SNI CLZ-mCherry vs. CLZ-hM4D: *P* < 0.05  2D post SNI CLZ-mCherry vs. CLZ-hM4D: *P* < 0.001  7D post SNI CLZ-mCherry vs. CLZ-hM4D: *P* < 0.001  14D post SNI CLZ-mCherry vs. CLZ-hM4D: *P* < 0.001  28D post SNI CLZ-mCherry vs. CLZ-hM4D: *P* < 0.001 |
| Fig. 2g | SNI CLZ-mCherry (n = 8, 4 males + 4 females)  SNI hM4D-mCherry (n = 9, 5 males + 4 females) | Mann-Whitney test  SNI CLZ-mCherry vs. SNI hM4D-mCherry: *P* < 0.001 |
| Fig. 2h | SNI CLZ-mCherry (n = 5, 3 males + 2 females)  SNI hM4D-mCherry (n = 5, 3 males + 2 females) | Mann-Whitney test  SNI CLZ-mCherry vs. SNI hM4D-mCherry: *P* < 0.05 |
| Fig. 2i | mCherry (n = 9, 5 males + 4 females)  hM3D (n = 5, 3 males + 2 females) | Mann-Whitney test  Pre CLZ-mCherry vs. hM3D: *P* = 0.5884  1D on CLZ-mCherry vs. CLZ-hM3D: *P* = 0.3452  2D on CLZ-mCherry vs. CLZ-hM3D:  *P* < 0.001  3D on CLZ-mCherry vs. CLZ-hM3D:  *P* < 0.001  5D on CLZ-mCherry vs. CLZ-hM3D:  *P* < 0.001  7D on CLZ-mCherry vs. CLZ-hM3D: *P* < 0.001  7D post CLZ-mCherry vs. CLZ-hM3D: *P* < 0.001  14D post CLZ-mCherry vs. CLZ-hM3D: *P* < 0.001  21D post CLZ-mCherry vs. CLZ-hM3D: *P* < 0.001  Nonparametric ANOVA (Friedman test), followed by Dunn's multiple comparison test  hM3D Pre vs. D1 on CLZ: *P* > 0.9999  hM3D Pre vs. D2 on CLZ: *P* > 0.9999  hM3D Pre vs. D3 on CLZ: *P* = 0.5174  hM3D Pre vs. D5 on CLZ: *P* = 0.1225  hM3D Pre vs. D7 on CLZ: *P* < 0.05  hM3D Pre vs. D7 post CLZ: *P* < 0.05  hM3D Pre vs. D14 post CLZ: *P* < 0.05  hM3D Pre vs. D21 post CLZ: *P* < 0.05 |
| Fig. 3b | Saline vs. CLZ (n = 8, 4 males + 4 females) | Wilcoxon matched-pairs signed rank test  Pre SNI saline vs. CLZ: *P* = 0.5884  2d post SNI saline vs. CLZ: *P* > 0.9999  14d post SNI saline vs. CLZ: *P* = 0.5884 |
| Fig. 3g | Saline vs. CLZ (n = 6, 3 males + 3 females) | Wilcoxon matched-pairs signed rank test  Pre SNI saline vs. CLZ: *P* = 0.5625  2d post SNI saline vs. CLZ: *P* < 0.05  14d post SNI saline vs. CLZ: *P* < 0.05 |
| Fig. 3h | hM3D (n = 6, 4 males + 2 females) | Nonparametric ANOVA (Friedman test), followed by Dunn's multiple comparison test  hM3D Pre vs. D1 on CLZ: *P* > 0.9999  hM3D Pre vs. D2 on CLZ: *P* > 0.9999  hM3D Pre vs. D3 on CLZ: *P* < 0.05  hM3D Pre vs. D5 on CLZ: *P* < 0.01  CLZ-hM3D Pre vs. D7 on CLZ: *P* < 0.01  hM3D Pre vs. D7 post CLZ: *P* < 0.01  hM3D Pre vs. D14 post CLZ: *P* < 0.01  hM3D Pre vs. D21 post CLZ: *P* < 0.05 |
| Fig. 3i | CLZ-GFP (n = 5, 3 males + 2 females)  CLZ-hM4D (n = 5, 3 males + 2 females) | Mann-Whitney test  CLZ-GFP vs. CLZ-hM4D phase I: *P* > 0.9999  CLZ-GFP vs. CLZ-hM4D phase II: *P* = 0.8413 |
| Fig. 4c | Saline vs. CLZ (n = 6, 3 males + 3 females) | Wilcoxon matched-pairs signed rank test  Pre SNI saline vs. CLZ : *P* > 0.9999  2d post SNI saline vs. CLZ : *P* = 0.25  14d post SNI saline vs. CLZ : *P* = 0.5 |
| Fig. 4d | Saline vs. CLZ (n = 7, 4 males + 3 females) | Wilcoxon matched-pairs signed rank test  Pre SNI saline vs. CLZ: *P* = 0.8438  2d post SNI saline vs. CLZ: *P* < 0.05  14d post SNI saline vs. CLZ: *P* < 0.05 |
| Fig. 4e | CLZ-mCherry (n = 6, 3 males + 3 females)  CLZ-hM4D (n = 7, 4 males + 3 females) | Mann-Whitney test  CLZ-mCherry vs. CLZ-hM4D: *P* < 0.01 |
| Fig. 4f | Control (4 male + 3 female)  Ablation (5 male + 3 female) | Mann-Whitney test  Pre CLZ-control vs. Pre CLZ-ablation: *P* = 0.0609  1D on CLZ-control vs. CLZ-ablation: *P* < 0.01  2D on CLZ-control vs. CLZ-ablation:  *P* < 0.001  3D on CLZ-mCherry vs. CLZ-hM3D:  *P* < 0.001  5D on CLZ-mCherry vs. CLZ-hM3D:  *P* < 0.001  7D on CLZ-mCherry vs. CLZ-hM3D: *P* < 0.001  7D post CLZ-mCherry vs. CLZ-hM3D: *P* < 0.001  14D post CLZ-mCherry vs. CLZ-hM3D: *P* < 0.001  21D post CLZ-mCherry vs. CLZ-hM3D: *P* < 0.001  Nonparametric ANOVA (Friedman test), followed by Dunn's multiple comparison test  control pre vs. D1 on CLZ: *P* > 0.9999  control Pre vs. D2 on CLZ: *P* = 0.2544  control Pre vs. D3 on CLZ: *P* < 0.05  control Pre vs. D5 on CLZ: *P* < 0.01  control Pre vs. D7 on CLZ: *P* < 0.05  control Pre vs. D7 post CLZ: *P* < 0.001  control Pre vs. D14 post CLZ: *P* < 0.01  control Pre vs. D21 post CLZ: *P* < 0.01 |
| Fig. 4g | CLZ-mCherry (n = 6, 3 males + 3 females)  CLZ-hM3D (n = 7, 4 males + 3 females) | Mann-Whitney test  CLZ-mCherry vs. CLZ-hM3D: P < 0.01 |
| Fig. 5c | SC-VPL Saline vs. CLZ (n = 7, 4 males + 3 females)  SC-PO Saline vs. CLZ (n = 5, 3 males + 2 females) | Wilcoxon matched-pairs signed rank test  VPL  Pre SNI saline vs. CLZ: *P* = 0.6250  2d post SNI saline vs. CLZ: *P* = 0.0625  14d post SNI saline vs. CLZ: *P* = 0.0625  Po  Pre SNI saline vs. CLZ: *P* > 0.9999  2d post SNI saline vs. CLZ: *P* > 0.9999  14d post SNI saline vs. CLZ: *P* > 0.9999 |
| Fig. 5d | SC-VPL+Po Saline vs.CLZ (n = 7, 4 males + 3 females) | Pre SNI saline vs. CLZ: *P* = 0.8125  2d post SNI saline vs. CLZ: *P* < 0.05  14d post SNI saline vs. CLZ: *P* < 0.05 |
| Fig. 5e | VPL+PO hM4D (n = 5, 3 males + 2 females)  VPL hM4D (n = 6, 3 males + 3 females) Po hM4D (n = 5, 3 males + 2 females) | One-way ANOVA, followed by Tukey's multiple comparisons test  VPL+Po hM4D vs. SpC to VPL hM4D: *P* < 0.001  VPL+Po hM4D vs. SpC to PO hM4D: *P* < 0.001  VPL hM4D SNI vs. Po hM4D SNI: *P* < 0.05 |
| Fig. 5f | Po hM3D (n = 5, 3 males + 2 females)  VPL hM3D (n = 5, 3 males + 2 females) | Nonparametric ANOVA (Friedman test), followed by Dunn's multiple comparison test  Po  hM3D Pre vs. D1 on CLZ: *P* > 0.9999  hM3D Pre vs. D2 on CLZ: *P* > 0.9999  hM3D Pre vs. D3 on CLZ: *P* =0.3972  hM3D Pre vs. D5 on CLZ: *P* < 0.05  CLZ-hM3D Pre vs. D7 on CLZ: *P* < 0.01  hM3D Pre vs. D7 post CLZ: *P* < 0.01  hM3D Pre vs. D14 post CLZ: *P* < 0.001  hM3D Pre vs. D21 post CLZ: *P* < 0.05  VPL  hM3D Pre vs. D1 on CLZ: *P* > 0.9999  hM3D Pre vs. D2 on CLZ: *P* > 0.9999  hM3D Pre vs. D3 on CLZ: *P* = 0.0750  hM3D Pre vs. D5 on CLZ: *P* < 0.01  CLZ-hM3D Pre vs. D7 on CLZ: *P* < 0.01  hM3D Pre vs. D7 post CLZ: *P* < 0.01  hM3D Pre vs. D14 post CLZ: *P* < 0.05  hM3D Pre vs. D21 post CLZ: *P* < 0.05 |
| Fig. 5g | Control (n = 5, 3 males + 2 females)  VPL hM4D (n = 5, 3 males + 2 females)  PO hM4D (n = 5, 3 males + 2 females) | Nonparametric ANOVA (Kruskal-Wallis test), Dunn's multiple comparison test  Cntl vs. VPL hM3D: *P* < 0.05  Cntl vs. Po hM3D: *P* < 0.05  VPL hM3D vs. Po hM3D: *P* > 0.9999 |
| Fig. 5h | VPL+Po hM4D (n = 5, 3 males + 2 females)  DCN-VPL hM4D (n = 6, 3 males + 3 females)  WT (n = 5, 3 males + 2 females) | Wilcoxon matched-pairs signed rank test  VPL+Po hM4D saline vs. CLZ: *P* = 0.0625  SCN+Po hM4D saline vs. CLZ: *P* < 0.05  WT saline vs. CLZ: *P* = 0.1250 |
| Fig. 5i | VPL+Po hM4D (n = 6, 3 males + 3 females)  DCN-VPL hM4D (n = 6, 3 males + 3 females)  WT (n = 5, 3 males + 2 females) | One-way ANOVA, followed by Holm–Šídák’s multiple comparisons test  WT vs. Cu to VPL: *P* < 0.001  VPL+PO vs. Cu to VPL: *P* < 0.05  WT vs. SpC to VPL PO: *P* = 0.1250 |
| Extended Data Fig. 1b | WT saline vs. 2.5 mg/Kg morphine vs. 5 mg/kg morphine (n = 5, 3 males, 2 females)  Oprm1Cre/+ saline vs. 2.5 mg/Kg morphine vs. 5 mg/kg morphine (n = 5, 3 males, 2 females)  Oprm1Cre/Cre saline vs. 2.5 mg/Kg morphine vs. 5 mg/kg morphine (n = 5, 3 males, 2 females) | Nonparametric ANOVA (Friedman test), followed by Dunn's multiple comparison test  WT Saline vs. 2.5 mg/kg morphine: *P* = 0.1733  WT Saline vs. 5 mg/kg morphine: *P* < 0.05  WT 2.5 mg/kg morphine vs. 5 mg/kg morphine: *P* > 0.9999  Oprm1Cre/+ Saline vs. 2.5 mg/kg morphine: *P* = 0.6177  Oprm1Cre/+ Saline vs. 5 mg/kg morphine: *P* < 0.01  Oprm1Cre/+ 2.5 mg/kg morphine vs. 5 mg/kg morphine: *P* = 0.2460  Oprm1Cre/Cre Saline vs. 2.5 mg/kg morphine: *P* > 0.9999  Oprm1Cre/Cre Saline vs. 5 mg/kg morphine: *P* > 0.9999  Oprm1Cre/Cre 2.5 mg/kg morphine vs. 5 mg/kg morphine: *P* > 0.9999 |
| Extended Data Fig. 1c | WT saline vs. 15 mg/Kg morphine (n = 6, 3 males, 3 females)  Oprm1Cre/+ saline vs. 15 mg/Kg morphine (n = 6, 3 males, 3 females)  Oprm1Cre/Cre saline vs. 15 mg/Kg morphine (n = 5, 3 males, 2 females) | Wilcoxon matched-pairs signed rank test  WT saline vs. 15 mg/Kg morphine: *P* < 0.05  Oprm1Cre/+ saline vs. 15 mg/Kg morphine: *P* < 0.05  Oprm1Cre/Cre saline vs. 15 mg/Kg morphine: *P* = 0.0625 |
| Extended Data Fig. 4b | Normal nonwithdrawal vs. withdrawal (n = 6, 4 males, 2 females)  SNI nonwithdrawal vs. withdrawal: (n = 6, 3 males, 3 females) | Paired t test  Normal nonwithdrawal vs. withdrawal: *P* < 0.01  SNI nonwithdrawal vs. withdrawal: *P* < 0.01 |
| Extended Data Fig. 4c | Von Frey normal (n = 7, 4 males, 3 females) vs. SNI (n = 8, 5 males, 3 females)  Hargreaves normal (n = 7, 4 males, 3 females) vs. SNI (n = 7, 4 males, 3 females)  Plantar cold normal (n = 7, 4 males, 3 females) vs. SNI (n = 7, 4 males, 3 females) | Mann-Whitney test  Von Frey normal vs. SNI: *P* < 0.001  Hargreaves normal vs. SNI: *P* = 0.62  Plantar cold normal vs. SNI: *P* < 0.01 |
| Extended Data Fig. 4e | Von Frey Pre, day2, 7, 21 post CFA  Hargreaves Pre, day2, 7, 21 post CFA  (n = 6, 3 males, 3 females for all groups) | Nonparametric ANOVA (Friedman test), followed by Dunn's multiple comparison test  Von Frey  Pre vs. 2D post CFA: *P* < 0.01  Pre vs. 7D post CFA: *P* > 0.9999  Pre vs. 21D post CFA: *P* > 0.9999  2D post CFA vs. 7D post CFA: *P* = 0.1521  2D post CFA vs. 21D post CFA: *P* = 0.0834  7D post CFA vs. 21D post CFA: *P* > 0.9999  Hargreaves  Pre vs. 2D post CFA: *P* = 0.4418  Pre vs. 7D post CFA: *P* > 0.9999  Pre vs. 21D post CFA: *P* > 0.9999  2D post CFA vs. 7D post CFA: *P* = 0.7051  2D post CFA vs. 21D post CFA: *P* = 0.2650  7D post CFA vs. 21D post CFA: *P* > 0.9999 |
| Extended Data Fig. 4f | Locomotion (normal)  Escape (normal) | Linear regression  Average Speed vs average %ΔF/F (normal)  Locomotion: R2 = 0.02113  95% Confidence Intervals  Slope-0.009340 to 0.003062  Y-intercept-0.03758 to 0.05273  X-intercept -infinity to +infinity  Escape: R2 = 0.8420  95% Confidence Intervals  Slope 0.09058 to 0.1166  Y-intercept -0.4496 to -0.1710  X-intercept 1.827 to 3.983 |
| Extended Data Fig. 4g | Loconotion BL  Escape BL  Locomotion SNI  Escape SNI  (n = 6, 3 males, 3 females for all groups) | One-way ANOVA, followed by Tukey's multiple comparisons test  Locomotion BL vs. escape BL: *P* < 0.05  Locomotion BL vs. Locomotion SNI: *P* = 0.9686  Locomotion BL vs. escape SNI: *P* < 0.01  Escape BL vs. Locomotion SNI: *P* < 0.01  Escape BL vs. Escape SNI: *P* < 0.05  Locomotion SNI vs. Escape SNI: *P* < 0.01 |
| Extended Data Fig. 4h | Evoked  Spontaneous  (n = 7, 4 males, 3 females for all groups) | Paired t test  *P* = 0.1553 |
| Extended Data Fig. 4k | Pre-SNI  Post-SNI  (n = 6, 3 males, 3 females for all groups) | Paired t test  *P* < 0.01 |
| Extended Data Fig. 5b | hM4D saline vs. clozapine (n = 5, 3 males, 2 females)  hM3D saline vs. clozapine (n = 5, 3 males, 2 females) | Wilcoxon matched-pairs signed rank test  hM4D saline vs. clozapine: *P* > 0.9999  hM3D saline vs. clozapine: *P* = 0.3125 |
| Extended Data Fig. 5c | saline vs. CLZ (n = 6, 3 males, 3 females) | Two-way ANOVA, followed by Šídák's multiple comparisons test  Saline vs. CLZ: *P* > 0.9 for all time points compared |
| Extended Data Fig. 5f | Baseline vs. after CNO (6 cells from 3 mice) | Wilcoxon matched-pairs signed rank test  Baseline vs. after CNO: *P* < 0.01 |
| Extended Data Fig. 5g | hM4D saline vs. clozapine (n = 6, 3 males + 3 females) | Wilcoxon matched-pairs signed rank test  hM4D saline vs. clozapine: *P* = 0.8438 |
| Extended Data Fig. 5i | Control no light vs. 20 Hz light (n = 6, 3 males + 3 females)  ChR2 no light vs. 20 Hz light (n = 6, 3 males + 3 females) | Wilcoxon matched-pairs signed rank test  Control no light vs. 20 Hz light: *P* = 0.2188  ChR2 no light vs. 20 Hz light: *P* = 0.6875 |
| Extended Data Fig. 5j | control no light vs. 20 Hz light (n = 6, 3 males + 3 females)  ChR2 no light vs. 20 Hz light (n = 5, 3 males + 2 females) | Wilcoxon matched-pairs signed rank test  Control no light vs. 20 Hz light: *P* = 0.0938  ChR2 no light vs. 20 Hz light: *P* = 0.8125 |
| Extended Data Fig. 5k | Control no light vs. 20 Hz light (n = 6, 3 males + 3 females)  ChR2 no light vs. 20 Hz light (n = 6, 3 males + 3 females) | Wilcoxon matched-pairs signed rank test  Control no light vs. 20 Hz light: *P* = 0.0625  ChR2 no light vs. 20 Hz light: *P* = 0.1563 |
| Extended Data Fig. 6a | hM4D Von Frey saline vs. CLZ (n = 8, 4 males, 4 females)  hM3D Von Frey saline vs. CLZ (n = 10, 5 males, 5 females) | Wilcoxon matched-pairs signed rank test  hM4D Von Frey saline vs. CLZ: *P* = 0.8125  hM3D Von Frey saline vs. CLZ: *P* = 0.9004 |
| Extended Data Fig. 6b | pre vs. post clozapine (n = 10, 5 males, 5 females) | Nonparametric ANOVA (Friedman test), followed by Dunn's multiple comparison test  pre vs. post clozapine: *P* > 0.9999 for all pairs tested |
| Extended Data Fig. 6f | CLZ-mCherry (n = 6, 3 males, 3 females)  CLZ-hM3D (n = 10, 5 males, 5 females) | Mann Whitney test  CLZ-mCherry vs. CLZ-hM3D: *P* < 0.05 |
| Extended Data Fig. 6g | pre vs. post clozapine (n = 5, 3 males, 2 females) | Nonparametric ANOVA (Friedman test), followed by Dunn's multiple comparison test  pre vs. post clozapine: *P* > 0.9999 for all pairs tested |
| Extended Data Fig. 6h | CLZ-mCherry (n = 8, 4 males, 4 females)  CLZ-hM4D (n = 8, 4 males, 4 females) | Mann Whitney test  CLZ-mCherry vs. CLZ-hM4D pre CFA: *P* = 0.7389  CLZ-mCherry vs. CLZ-hM4D 1d post CFA: *P* < 0.001  CLZ-mCherry vs. CLZ-hM4D 2d post CFA: *P* < 0.001  CLZ-mCherry vs. CLZ-hM4D 3d post CFA: *P* < 0.001 |
| Extended Data Fig. 6i | CLZ-mCherry (n = 8, 4 males, 4 females)  CLZ-hM4D (n = 8, 4 males, 4 females) | Mann Whitney test  CLZ-mCherry vs. CLZ-hM4D pre CFA: *P* = 0.7002  CLZ-mCherry vs. CLZ-hM4D 1d post CFA: *P* = 0.7002  CLZ-mCherry vs. CLZ-hM4D 2d post CFA: *P* = 0.2047  CLZ-mCherry vs. CLZ-hM4D 3d post CFA: *P* = 0.0985 |
| Extended Data Fig. 7b | Control (n = 5, 3 males, 2 females)  Caspase (n = 5, 3 males, 2 females) | Mann Whitney test  Control vs. caspase: *P* < 0.01 |
| Extended Data Fig. 7c | Control (n = 3, 3 males)  Caspase (n = 3, 3 males) | Mann Whitney test  Control vs. caspase: *P* > 0.9999 |
| Extended Data Fig. 7d | Control (n = 4, 2 males + 2 females)  Caspase (n = 4, 2 males + 2 females) | Mann Whitney test  Control vs. caspase: *P* < 0.05 |
| Extended Data Fig. 7e | Control (n = 7, 4 males + 3 females)  Caspase (n = 8, 4 males + 4 females) | Mann-Whitney test  Pre-ablation control vs. caspase: *P* = 0.5358  Post-ablation control vs. caspase: *P* = 0.5158  1d post CFA control vs. caspase: *P* < 0.001  2d post SNI control vs. caspase: *P* < 0.001  3d post SNI control vs. caspase: *P* < 0.001 |
| Extended Data Fig. 8a | eGFP+7DCLZ (n= 5, 3 males+ 2 females)  hM3D+7DCLZ (n = 6, 3 males + 3 females)  SNI_eGFP+CLZ (n = 6, 3 males + 3 females)  SNI_hM4D+CLZ (n = 5, 3 males + 2 females) | One-way ANOVA, followed by Tukey's multiple comparisons test  0.007g  eGFP+7DCLZ vs. hM3D+7DCLZ: *P* < 0.0001  eGFP+7DCLZ vs. SNI_eGFP+CLZ: *P* < 0.0001  eGFP+7DCLZ vs. SNI_hM4D+CLZ: *P* < 0.05  hM3D+7DCLZ vs. SNI_eGFP+CLZ: *P* = 0.9424  hM3D+7DCLZ vs. SNI_hM4D+CLZ: *P* < 0.001  SNI_eGFP+CLZ vs. SNI_hM4D+CLZ: *P* < 0.0001  0.4g  eGFP+7DCLZ vs. hM3D+7DCLZ: *P* < 0.0001  eGFP+7DCLZ vs. SNI_eGFP+CLZ: *P* < 0.0001  eGFP+7DCLZ vs. SNI_hM4D+CLZ: *P* = 0.3070  hM3D+7DCLZ vs. SNI_eGFP+CLZ: *P* = 0.9579  hM3D+7DCLZ vs. SNI_hM4D+CLZ: *P* < 0.001  SNI_eGFP+CLZ vs. SNI_hM4D+CLZ: *P* < 0.001  2g  eGFP+7DCLZ vs. hM3D+7DCLZ: *P* < 0.05  eGFP+7DCLZ vs. SNI_eGFP+CLZ: *P* < 0.05  eGFP+7DCLZ vs. SNI_hM4D+CLZ: *P* = 0.9975  hM3D+7DCLZ vs. SNI_eGFP+CLZ: *P* = 0.9996  hM3D+7DCLZ vs. SNI_hM4D+CLZ: *P* < 0.01  SNI_eGFP+CLZ vs. SNI_hM4D+CLZ: *P* < 0.01 |
| Extended Data Fig. 8b | eGFP+7DCLZ (n = 9, 5 males+ 4 females)  hM3D+7DCLZ (n = 10, 5 males + 5 females)  SNI_eGFP+CLZ (n = 8, 4 males + 4 females)  SNI_hM4D+CLZ (n = 10, 5 males + 5 females) | One-way ANOVA, followed by Tukey's multiple comparisons test  eGFP+7DCLZ vs. hM3D+7DCLZ: *P* =0.7413  eGFP+7DCLZ vs. SNI_eGFP+CLZ: *P* < 0.01  eGFP+7DCLZ vs. SNI_hM4D+CLZ: *P* > 0.9999  hM3D+7DCLZ vs. SNI_eGFP+CLZ: *P* < 0.001  hM3D+7DCLZ vs. SNI_hM4D+CLZ: *P* =0.7338  SNI_eGFP+CLZ vs. SNI_hM4D+CLZ: *P* < 0.01 |
| Extended Data Fig. 8c | eGFP+7DCLZ (n = 8, 4 males + 4 females)  hM3D+7DCLZ (n = 8, 4 males + 4 females)  SNI_eGFP+CLZ (n = 10, 5 males + 5 females)  SNI_hM4D+CLZ (n = 8, 4 males + 4 females) | Nonparametric ANOVA (Kruskal-Wallis test), Dunn's multiple comparison test  eGFP+7DCLZ vs. hM3D+7DCLZ: *P* > 0.9999  eGFP+7DCLZ vs. SNI_eGFP+CLZ: *P* < 0.05  eGFP+7DCLZ vs. SNI_hM4D+CLZ: *P* > 0.9999  hM3D+7DCLZ vs. SNI_eGFP+CLZ: *P* < 0.01  hM3D+7DCLZ vs. SNI_hM4D+CLZ: *P* >0.9999  SNI_eGFP+CLZ vs. SNI_hM4D+CLZ: *P* < 0.01 |
| Extended Data Fig. 8d | eGFP+7DCLZ (n = 6, 3 males + 3 females)  hM3D+7DCLZ (n = 5, 3 males + 2 females)  SNI_eGFP+CLZ (n = 5, 3 males + 2 females)  SNI_hM4D+CLZ (n = 5, 3 males + 2 females) | One-way ANOVA, followed by Tukey's multiple comparisons test  eGFP+7DCLZ vs. hM3D+7DCLZ: *P* =0.7645  eGFP+7DCLZ vs. SNI_eGFP+CLZ: *P* = 0.9834  eGFP+7DCLZ vs. SNI_hM4D+CLZ: *P* = 0.9992  hM3D+7DCLZ vs. SNI_eGFP+CLZ: *P* = 0.5871  hM3D+7DCLZ vs. SNI_hM4D+CLZ: *P* = 0.8476  SNI_eGFP+CLZ vs. SNI_hM4D+CLZ: *P* = 0.9652 |
| Extended Data Fig. 8e | eGFP+7DCLZ (n = 9, 5 males+ 4 females)  hM3D+7DCLZ (n = 10, 5 males + 5 females)  SNI_eGFP+CLZ (n = 9, 5 males + 4 females)  SNI_hM4D+CLZ(n = 7, 4 males + 3 females) | Nonparametric ANOVA (Kruskal-Wallis test), Dunn's multiple comparison test  Total distance  eGFP+7DCLZ vs. hM3D+7DCLZ: *P* = 0.2431  eGFP+7DCLZ vs. SNI_eGFP+CLZ: *P* = 0.3374  eGFP+7DCLZ vs. SNI_hM4D+CLZ: *P* = 0.1490  hM3D+7DCLZ vs. SNI_eGFP+CLZ: *P* > 0.9999  hM3D+7DCLZ vs. SNI_hM4D+CLZ: *P* > 0.9999  SNI_eGFP+CLZ vs. SNI_hM4D+CLZ: *P* > 0.9999  One-way ANOVA, followed by Tukey's multiple comparisons test  % time in center  eGFP+7DCLZ vs. hM3D+7DCLZ: *P* < 0.05  eGFP+7DCLZ vs. SNI_eGFP+CLZ: *P* < 0.05  eGFP+7DCLZ vs. SNI_hM4D+CLZ: *P* < 0.01  hM3D+7DCLZ vs. SNI_eGFP+CLZ: *P* = 0.9832  hM3D+7DCLZ vs. SNI_hM4D+CLZ: *P* = 0.6992  SNI_eGFP+CLZ vs. SNI_hM4D+CLZ: *P* = 0.8834 |
| Extended Data Fig. 8f | eGFP+7DCLZ (n = 7, 4 males+ 3 females)  hM3D+7DCLZ (n = 10, 5 males + 5 females)  SNI_eGFP+CLZ (n = 9, 5 males + 4 females)  SNI_hM4D+CLZ (n = 9, 5 males + 4 females) | One-way ANOVA, followed by Tukey's multiple comparisons test  eGFP+7DCLZ vs. hM3D+7DCLZ: *P* < 0.01  eGFP+7DCLZ vs. SNI_eGFP+CLZ: *P* < 0.01  eGFP+7DCLZ vs. SNI_hM4D+CLZ: *P* < 0.001  hM3D+7DCLZ vs. SNI_eGFP+CLZ: *P* = 0.9987  hM3D+7DCLZ vs. SNI_hM4D+CLZ: *P* = 0.7408  SNI_eGFP+CLZ vs. SNI_hM4D+CLZ: *P* = 0.6675 |
| Extended Data Fig. 8g | eGFP+7DCLZ (n = 6, 3 males+ 3 females)  hM3D+7DCLZ (n = 8, 4 males + 4 females)  SNI_eGFP+CLZ (n = 8, 4 males + 4 females)  SNI_hM4D+CLZ (n = 9, 5 males + 4 females) | Nonparametric ANOVA (Kruskal-Wallis test), Dunn's multiple comparison test  eGFP+7DCLZ vs. hM3D+7DCLZ: *P* > 0.9999  eGFP+7DCLZ vs. SNI_eGFP+CLZ: *P* = 0.4322  eGFP+7DCLZ vs. SNI_hM4D+CLZ: *P* < 0.01  hM3D+7DCLZ vs. SNI_eGFP+CLZ: *P* = 0.3926  hM3D+7DCLZ vs. SNI_hM4D+CLZ: *P* < 0.01  SNI_eGFP+CLZ vs. SNI_hM4D+CLZ: *P* > 0.9999 |
| Extended Data Fig. 9a | CLZ-mCherry (n = 6, 3 males + 3 females)  CLZ-hM4D (n = 6, 3 males+ 3 females) | Mann-Whitney test  CLZ-mCherry vs. CLZ-hM4D: *P* <0.01 |
| Extended Data Fig. 9b | CLZ-mCherry (n = 6, 3 males + 3 females)  CLZ-hM3D (n = 5, 3 males+ 2 females) | Mann-Whitney test  CLZ-mCherry vs. CLZ-hM4D: *P* <0.05 |
| Extended Data Fig. 10b | Control (n = 6, 3 males + 3 females)  Ablation (n = 6, 3 males + 3 females) | Mann-Whitney test  Pre CLZ-control vs. Pre CLZ-ablation: *P* = 0.05779  1D on CLZ-control vs. CLZ-ablation: *P* < 0.01  2D on CLZ-control vs. CLZ-ablation:  *P* < 0.01  3D on CLZ-mCherry vs. CLZ-hM3D:  *P* < 0.01  5D on CLZ-mCherry vs. CLZ-hM3D:  *P* < 0.01  7D on CLZ-mCherry vs. CLZ-hM3D: *P* < 0.01  7D post CLZ-mCherry vs. CLZ-hM3D: *P* < 0.01  14D post CLZ-mCherry vs. CLZ-hM3D: *P* < 0.01  21D post CLZ-mCherry vs. CLZ-hM3D: *P* < 0.01  Nonparametric ANOVA (Friedman test), followed by Dunn's multiple comparison test  control pre vs. D1 on CLZ: *P* > 0.9999  control Pre vs. D2 on CLZ: *P* = 0.4633  control Pre vs. D3 on CLZ: *P* < 0.05  control Pre vs. D5 on CLZ: *P* < 0.01  control Pre vs. D7 on CLZ: *P* < 0.001  control Pre vs. D7 post CLZ: *P* < 0.001  control Pre vs. D14 post CLZ: *P* < 0.05  control Pre vs. D21 post CLZ: *P* < 0.05 |
| Extended Data Fig. 10c | eYFP+7DCLZ (n = 7, 4 males+ 3 females) hM3D+7DCLZ (n = 7, 4 males + 3 females) | Mann Whitney test  Total distance eYFP+7DCLZ vs. hM3D+7DCLZ: *P* = 0.7104  % time in center: eYFP+7DCLZ vs. hM3D+7DCLZ: *P* < 0.01 |
| Extended Data Fig. 10d | eYFP+7DCLZ (n = 8, 4 males+ 4 females) hM3D+7DCLZ (n = 8, 4 males + 4 females) | Mann Whitney test  EPM eYFP+7DCLZ vs. hM3D+7DCLZ: *P* < 0.01  TST eYFP+7DCLZ vs. hM3D+7DCLZ: *P* = 0.1949 |
| Extended Data Fig. 10e | Saline vs. CLZ (n = 6, 3 males + 3 females) | Wilcoxon matched-pairs signed rank test  Pre SNI saline vs. CLZ : *P* = 0.2188  2d post SNI saline vs. CLZ : *P* = 0.5  14d post SNI saline vs. CLZ : *P* = 0.5 |
